# Supplementary material for: Experimental study on light volatile products from thermal decomposition of lignin monomer model compounds: effect of temperature, residence time and methoxyl group
Source: Royal Society of Chemistry journal article supplement (doi:10.1039/d1ra06743e), 2021-01-01
Supplement: d1ra06743e1.pdf [file d1ra06743e1.pdf]

Table A1. Gas Chromatography configuration and instrument conditions.

| Instrument       | Separation column                           | Detector | Conditions                                                                                                                                                | Compounds detected                                                                                                                                                                                                                                                                           |
|------------------|---------------------------------------------|----------|-----------------------------------------------------------------------------------------------------------------------------------------------------------|----------------------------------------------------------------------------------------------------------------------------------------------------------------------------------------------------------------------------------------------------------------------------------------------|
| Shimadzu GC-2014 | Gaskuropack 54                              | FID      |                                                                                                                                                           | Methane, Ethane, Ethene+Ethyne, Propane, Propene, Propyne, Benzene, Methanol, Ethanol                                                                                                                                                                                                        |
|                  | Length: 4 m<br>(Packed column, GL Sciences) |          | Injector; 473 K<br>Detector; 493 K<br>TCD current; 110 mA                                                                                                 |                                                                                                                                                                                                                                                                                              |
|                  | Gaskuropack 54                              | TCD      | Temperature program; 10 min hold at 313 K, then heated at 5 K min <sup>-1</sup> to 473 K, and 30 min hold at 473 K.                                       | Carbon monoxide, Carbon dioxide, Water (vapor)                                                                                                                                                                                                                                               |
|                  | VZN-1                                       | TCD      | Injector; 333 K<br>Detector; 333 K<br>TCD current; 110 mA<br>Temperature program; isothermal at 313 K.                                                    | Ethyne, Propadiene, Hydrogen                                                                                                                                                                                                                                                                 |
| Shimadzu GC-2010 | PoraBOND                                    | FID      | Injector; 618 K<br>Detector; 573 K<br>Temperature program; 10 min hold at 313 K, then heated at 5 K min <sup>-1</sup> to 573 K, and 30 min hold at 573 K. | Butane, But-1-ene, But-2-ene, 1,3-Butadiene, 1-Buten-3-yn, Cyclopentadiene, 1,4-Pentadiene, 1,2-Pentadiene, Hexadiene, Benzene, Toluene, Xylenes, Styrene, Ethylbenzene, Naphthalene, Anthracene<br>Phenanthrene, 2-Furaldehyde, Furan, Acetone, Acetic acid, Acetaldehyde, Phenol, Cresols. |
